# Supplementary material
Source: Springer Nature journal article supplement (https://www.springermedizin.de/resource/supplementary/13012_2013_690_MOESM3_ESM.pdf/9630248)

- I have changed my clinical decision-making through EBP implementation
- I have newly added my clinical decision-making through EBP implementation
- I have reassured my clinical decision-making through EBP implementation

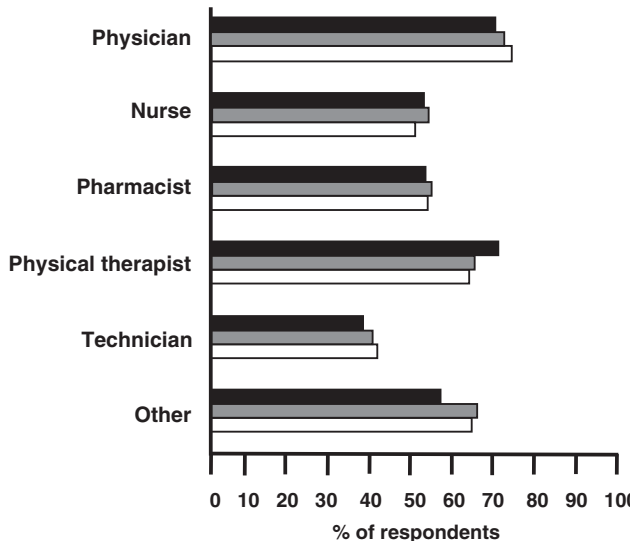

Supplement: MOESM3 [file 9630248]
